# Supplementary material
Source: MDPI journal article supplement (https://www.mdpi.com/2071-1050/13/24/13808)
Supplement: s1 [file s1]

# SUPPLEMENTARY

**Table S1.** Frequency of different modes of commuting to school and from school back home for **boys**.

|                     |                                        | Commuting from School |            |             |          |                                        |             |
|---------------------|----------------------------------------|-----------------------|------------|-------------|----------|----------------------------------------|-------------|
| Commuting to School |                                        | Car                   | Bus, train | Walk        | Bicycle  | Skateboard, Roller Skate, Kick Scooter | Total       |
|                     | Car                                    | 11 (6.3%)             | 2 (1.1%)   | 15 (8.5%)   | 0        | 0                                      | 28 (15.9%)  |
|                     | Bus, train                             | 0                     | 23 (13.1%) | 10 (5.7%)   | 0        | 0                                      | 33 (18.8%)  |
|                     | Walk                                   | 2 (1.1%)              | 0          | 99 (56.3%)  | 0        | 0                                      | 101 (57.4%) |
|                     | Bicycle                                | 0                     | 0          | 3 (1.7%)    | 9 (5.1%) | 0                                      | 12 (6.8%)   |
|                     | Skateboard, Roller Skate, Kick Scooter | 0                     | 0          | 0           | 0        | 2 (5.1%)                               | 2 (1.1%)    |
|                     | Total                                  | 13 (7.4%)             | 25 (14.2%) | 127 (72.2%) | 9 (5.1%) | 2 (1.1%)                               | 176 (100%)  |

**Table S2.** Frequency of different modes of commuting to school and from school back home for **girls**.

|                     |                                        | Commuting from School |            |             |          |                                        |             |
|---------------------|----------------------------------------|-----------------------|------------|-------------|----------|----------------------------------------|-------------|
| Commuting to School |                                        | Car                   | Bus, train | Walk        | Bicycle  | Skateboard, Roller Skate, Kick Scooter | Total       |
|                     | Car                                    | 9 (5.5%)              | 5 (3.1%)   | 16 (9.8%)   | 0        | 0                                      | 30 (18.4%)  |
|                     | Bus, train                             | 0                     | 16 (9.8%)  | 3 (1.8%)    | 0        | 0                                      | 19 (11.7%)  |
|                     | Walk                                   | 0                     | 1 (0.6%)   | 111 (68.1%) | 0        | 0                                      | 112 (68.7%) |
|                     | Bicycle                                | 0                     | 0          | 0           | 2 (1.2%) | 0                                      | 2 (1.2%)    |
|                     | Skateboard, Roller Skate, Kick Scooter | 0                     | 0          | 0           | 0        | 0                                      | 0           |
|                     | Total                                  | 9 (5.5%)              | 22 (13.5%) | 130 (79.8%) | 2 (1.2%) | 0                                      | 163 (100%)  |

**Table S3.** Proportion of children who live within 3 km distance to school and use passive or mixed commuting to school across different reasons for not actively commuting to school, separated by gender.

| Reasons for not actively commuting to school          | Commuting to/from school   |                          |            |                            |                          |            |
|-------------------------------------------------------|----------------------------|--------------------------|------------|----------------------------|--------------------------|------------|
|                                                       | Boys                       |                          |            | Girls                      |                          |            |
|                                                       | Passive in both directions | Passive in one direction | Total      | Passive in both directions | Passive in one direction | Total      |
|                                                       | n=36                       | n=27                     | n=63       | n=30                       | n=20                     | n=50       |
| School is too far from home.                          | 26 (72.2%)                 | 10 (37.0%)               | 36 (57.1%) | 22 (73.3)                  | 2 (10.0%)                | 24 (44.0%) |
| I do not want to be late for school.                  | 12 (33.3%)                 | 11 (40.7%)               | 23 (36.6%) | 7 (23.3%)                  | 7 (35.0%)                | 14 (28%)   |
| The school coincides with parents' working schedule.  | 3 (8.3%)                   | 3 (11.1%)                | 6 (9.5%)   | 6 (20.0%)                  | 6 (30.0%)                | 12 (24.0%) |
| Because of my after-curriculum activities.            | 5 (13.9%)                  | 2 (7.4%)                 | 7 (11.1%)  | 5 (16.7%)                  | 3 (15.0%)                | 8 (16.0%)  |
| I do not want to walk or cycle to school.             | 3 (8.3%)                   | 4 (14.8%)                | 7 (11.1%)  | 4 (13.3%)                  | 0                        | 4 (8.0%)   |
| The school path is not traffic safe.                  | 0                          | 1 (3.7%)                 | 1 (1.6%)   | 7 (23.3%)                  | 0                        | 7 (14.0%)  |
| None of my friends are going to school by themselves. | 2 (5.6%)                   | 1 (3.7%)                 | 3 (4.8%)   | 2 (6.7%)                   | 3 (15.0%)                | 5 (10.0%)  |
| School path is not safe, due to high crime rates.     | 0                          | 0                        | 0          | 1 (3.3%)                   | 0                        | 1 (2.0%)   |
